# Supplementary material for: Pomalidomide combinations are a safe and effective option after daratumumab failure
Source: Springer Nature journal article supplement (doi:10.1007/s00432-023-04637-x), 2023-02-13
Supplement: MOESM1 [file 432_2023_4637_MOESM1_ESM.pdf]

## SUPPLEMENTARY TABLES

**Supplementary Table 1.** Responses to daratumumab and pomalidomide combinations

| <b>Responses</b> | <b>Responses to prior daratumumab combinations N=30 (%)</b> | <b>Current responses to pomalidomide combinations N=30 (%)</b> |
|------------------|-------------------------------------------------------------|----------------------------------------------------------------|
| CR               | 0                                                           | 2 (7%)                                                         |
| VGPR             | 3 (10%)                                                     | 3 (10%)                                                        |
| PR               | 8 (27%)                                                     | 11 (37%)                                                       |
| MR               | 0                                                           | 1 (3%)                                                         |
| SD               | 5 (17%)                                                     | 8 (27%)                                                        |
| PD               | 13 (43%)                                                    | 5 (17%)                                                        |
| NA               | 1 (3%)                                                      | 0                                                              |
| ORR              | 11 (37%)                                                    | 16 (53%)                                                       |
| CBR              | 11 (37%)                                                    | 17 (57%)                                                       |
| DCR              | 16 (53%)                                                    | 25 (83%)                                                       |

CR: complete response; VGPR: very good partial response; PR: partial response; MR: minimal response; SD: stable disease; PD: progressive disease

ORR: overall response rate ( $\geq$ PR); CBR: clinical benefit rate ( $\geq$ MR); DCR: disease control rate ( $\geq$ SD)

**Supplementary Table 2.** Responses to daratumumab and pomalidomide combinations in patients with extramedullary myeloma

| <b>Responses</b> | <b>Responses to prior daratumumab combinations N=7 (%)</b> | <b>Current responses to pomalidomide combinations N=7 (%)</b> |
|------------------|------------------------------------------------------------|---------------------------------------------------------------|
| CR               | 0                                                          | 1 (14%)                                                       |
| VGPR             | 1 (14%)                                                    | 0                                                             |
| PR               | 1 (14%)                                                    | 3 (43%)                                                       |
| MR               | 0                                                          | 1 (14%)                                                       |
| SD               | 0                                                          | 1 (14%)                                                       |
| PD               | 5 (71%)                                                    | 1 (14%)                                                       |
| ORR              | 2/7 (28%)                                                  | 4/7 (57%)                                                     |
| CBR              | 2/7 (28%)                                                  | 5/7 (71%)                                                     |
| DCR              | 2/7 (28%)                                                  | 6/7 (86%)                                                     |

CR: complete response; VGPR: very good partial response; PR: partial response; MR: minimal response; SD: stable disease; PD: progressive disease

ORR: overall response rate ( $\geq$ PR); CBR: clinical benefit rate ( $\geq$ MR); DCR: disease control rate ( $\geq$ SD)
